# Supplementary material
Source: publisher figshare collection journal article supplement (https://acs.figshare.com/ndownloader/files/33397379)
Supplement: Supplementary file 1 [file 33397379]

# **A Small Footprint and Robust Interface for Solid Phase Microextraction and Mass Spectrometry based on Vibrating Sharp-edge Spray Ionization**

*Jing Wang,<sup>[a]</sup> Chong Li,<sup>[a]</sup> Peng Li<sup>\*[a]</sup>*

[a]. C. Eugene Bennett Department of Chemistry, West Virginia University, Morgantown, WV, USA.

\* Correspondence should be addressed to P.L. (peng.li@mail.wvu.edu)

Table S1 – Low flow rates achieved by cVSSI

Table S2 – Recovery test for spiked samples

Table S3 – Data for all the calibration curves

Table S4 – Typical Therapeutic concentrations of drugs tested.

Figure S1 – Optimization of device distance to the mass spectrometer inlet

Figure S2 – Optimization of capillary angle to the mass spectrometer inlet

Figure S3 – A close up picture of the cVSSI-MS setup

Figure S4 – Comparison of mass spectra with different capillary temperature

Figure S5 – Comparison of mass spectra with different spray time

Figure S6 – Comparison of capillaries with 15  $\mu\text{m}$  and 50  $\mu\text{m}$  tip size

Figure S7 – Comparison of mass spectra obtained with glue seal and without glue

Figure S8 – Study of desorption time for 100 nM samples

Figure S9 – A full range calibration curve of SPME-cVSSI-MS for metoprolol in serum

Figure S10 – A full range calibration curve of SPME-nESI-MS for metoprolol in serum

Figure S11 – Calibration curves for 4 different drug compounds from serum samples.

| <b>Frequency<br/>(kHz)</b> | <b>Amplitude<br/>(V<sub>pp</sub>)</b> | <b>Volume<br/>(μL)</b> | <b>Flow Rate<br/>(μL/min)</b> |
|----------------------------|---------------------------------------|------------------------|-------------------------------|
| 93                         | 7                                     | 6                      | 0.46±0.02                     |
| 93                         | 9                                     | 6                      | 0.58±0.03                     |
| 93                         | 11                                    | 6                      | 0.70±0.02                     |

Table S1 Spray flow rates of the cVSSI for a 15 μm pulled-tip capillary under different input voltage.

| Analyte    | Spiked Concentration<br>(ng/mL) | Found Concentration<br>(ng/mL) | (%) Recovery<br>( $\pm$ SD) |
|------------|---------------------------------|--------------------------------|-----------------------------|
| metoprolol | 0.267                           | 0.24( $\pm$ 0.01)              | 91( $\pm$ 4)                |
|            | 6.675                           | 5.54 ( $\pm$ 0.20)             | 83( $\pm$ 3)                |
|            | 13.36                           | 10.69 ( $\pm$ 0.20)            | 80( $\pm$ 2)                |
|            | 20.25                           | 17.62 ( $\pm$ 0.91)            | 87( $\pm$ 5)                |
|            | 26.7                            | 21.89 ( $\pm$ 0.99)            | 82( $\pm$ 4)                |

Table S2 Recovery test for spiked metoprolol samples at different concentrations.

| Analyte      | Dynamic Range (ng/mL) | Linear Curve   | R <sup>2</sup> |
|--------------|-----------------------|----------------|----------------|
| Metoprolol   | 0.267-26.7            | Y=0.038X-0.007 | 0.9968         |
| Pindolol     | 0.249-24.9            | Y=0.006X+0.040 | 0.9701         |
| Irinotecan   | 0.585-58.5            | Y=0.016-0.045  | 0.9856         |
| Capecitabine | 0.360-36.0            | Y=0.010X+0.082 | 0.9918         |
| Acebutolol   | 0.337-33.7            | Y=0.010X-0.040 | 0.9920         |
| Oxprenolol   | 0.266-26.6            | Y=0.010X+0.054 | 0.9924         |

Table S3 Calibration curves for all the compounds tested.

| Analyte      | Therapeutic Concentration<br>(ng/mL) | Limit of Detection<br>of the present<br>method<br>(ng/mL) | Reference |
|--------------|--------------------------------------|-----------------------------------------------------------|-----------|
| Metoprolol   | 14 to 212                            | 0.27                                                      | [1]       |
| Pindolol     | 100                                  | 0.25                                                      | [2]       |
| Irinotecan   | 1600                                 | 0.59                                                      | [3]       |
| Capecitabine | 2700 to 4000                         | 0.36                                                      | [4]       |
| Acebutolol   | 200 to 2000                          | 0.34                                                      | [5]       |
| Oxprenolol   | 680                                  | 0.27                                                      | [6]       |

Table S4 Typical Therapeutic concentrations of drugs tested.

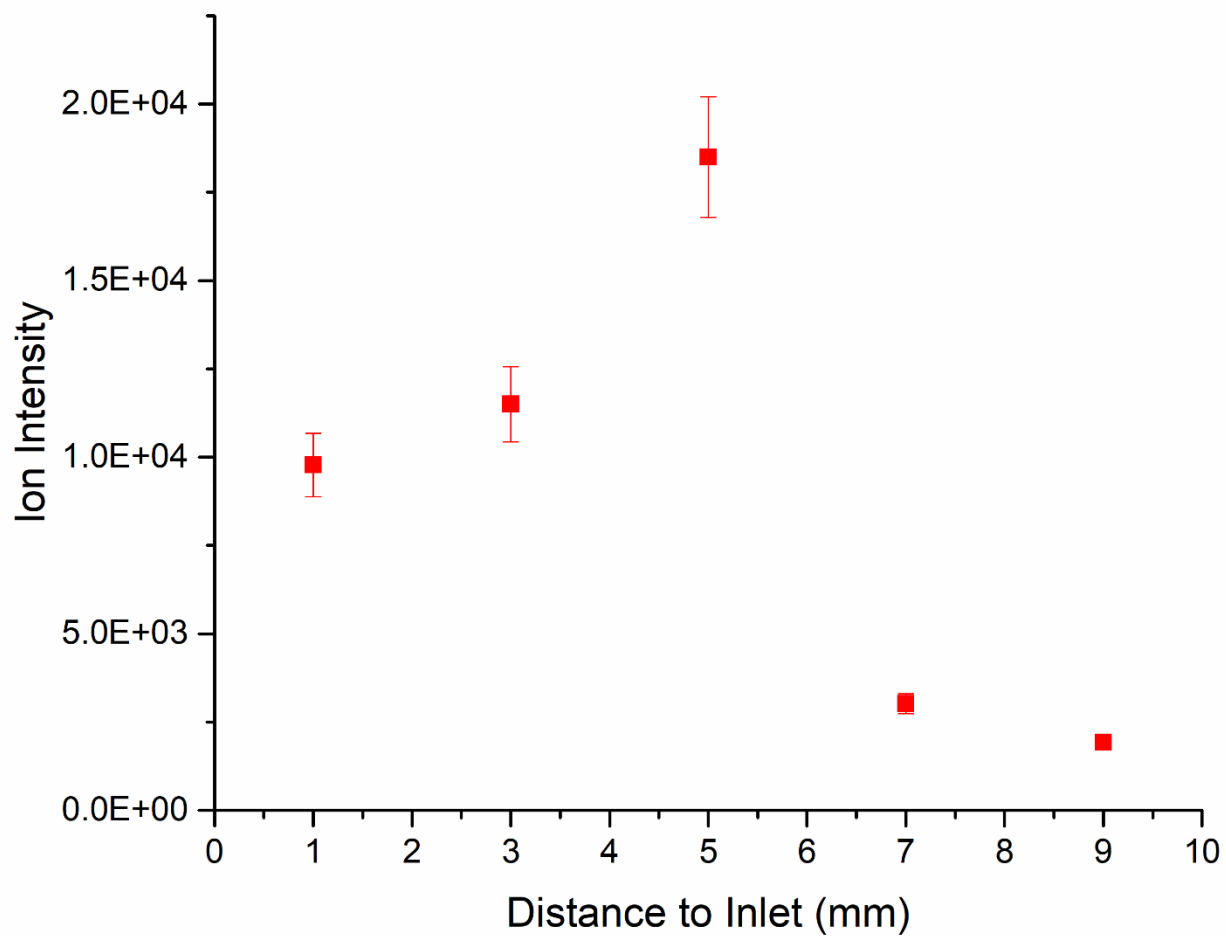

Figure S1: The relationship between ion intensity and the distance to the mass spectrometer inlet. The optimal distance to the inlet was determined to be 5 mm.

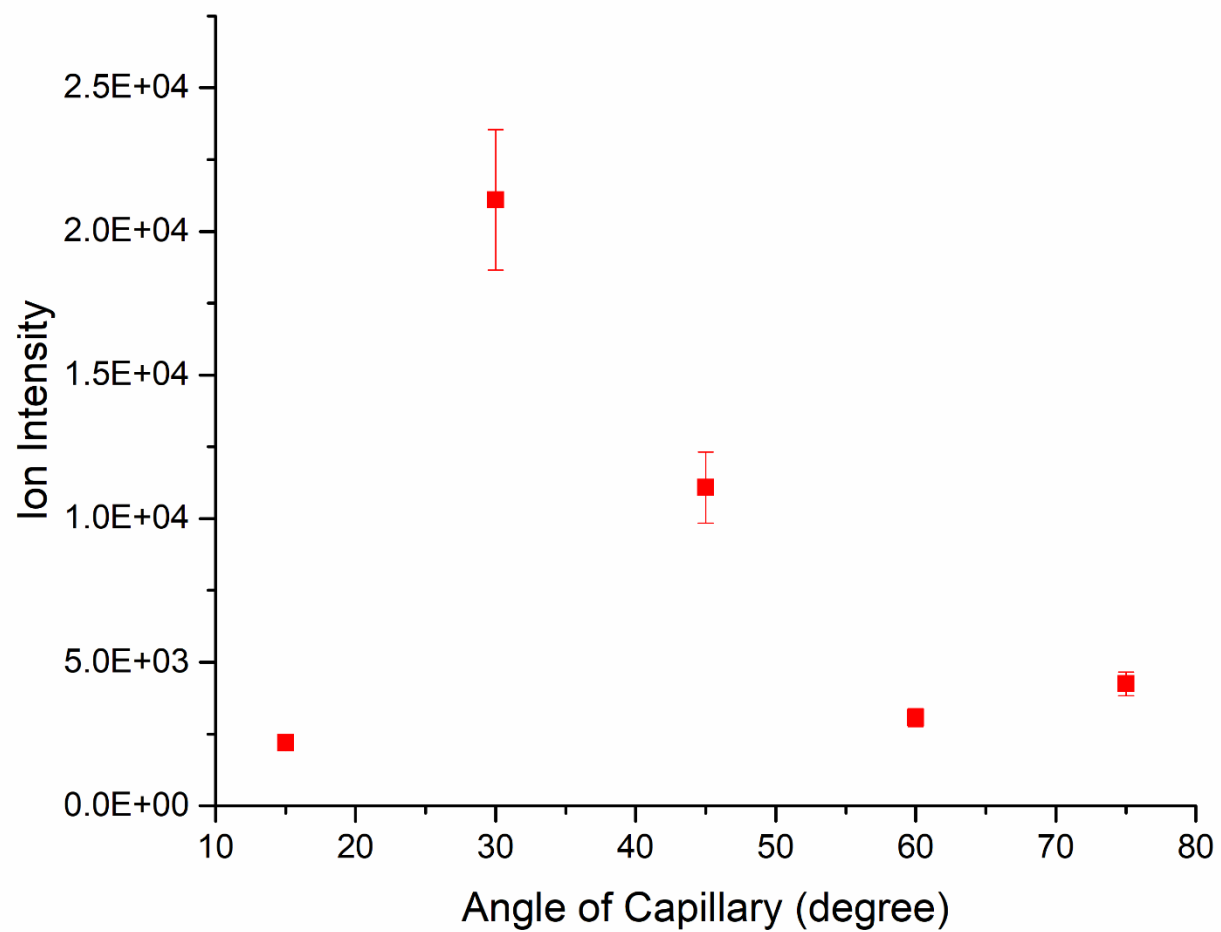

Figure S2: The relationship between ion intensity and the angle to the mass spectrometer inlet. The optimal distance to the inlet was determined to be 30 degree.

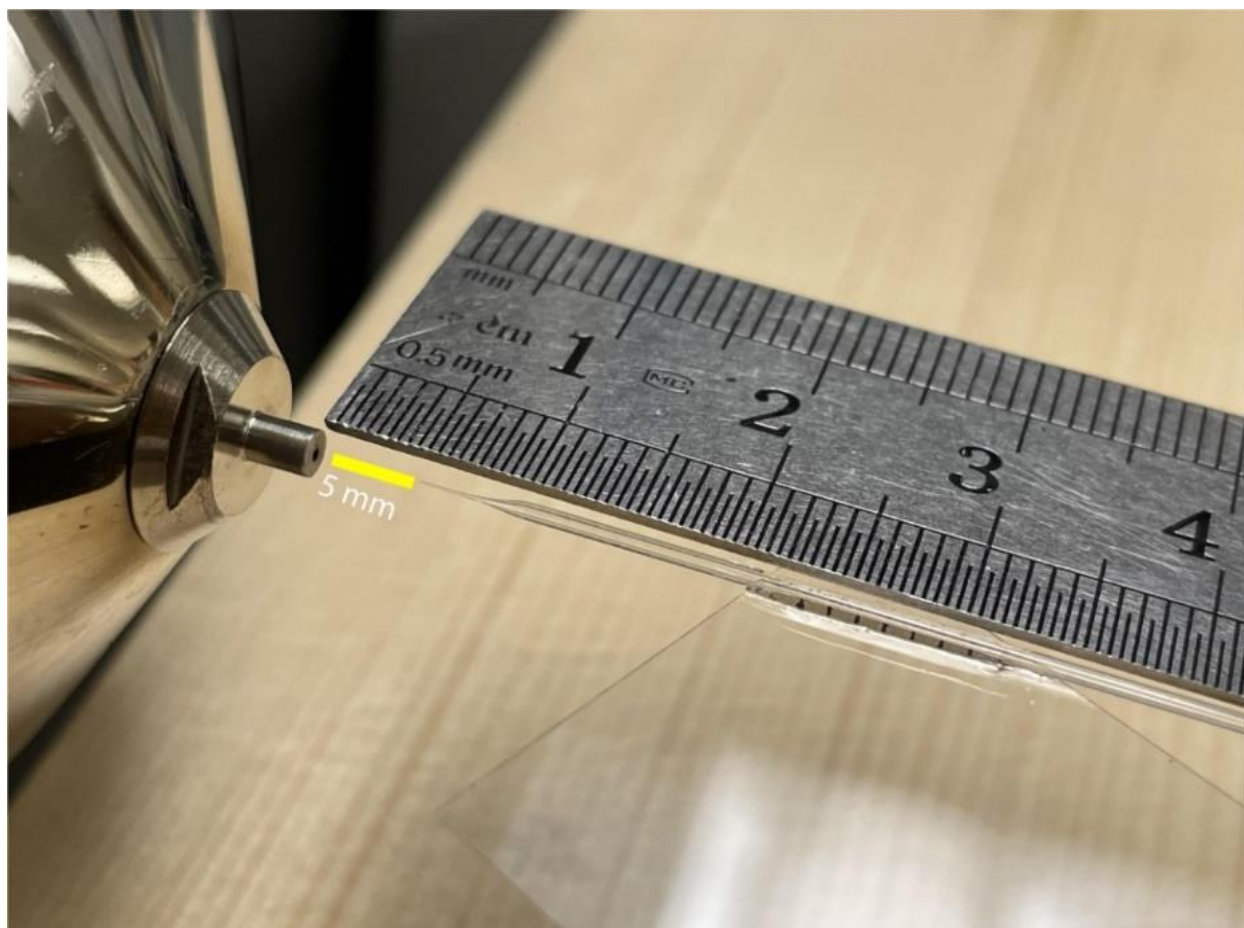

Figure S3 A close up picture of the cVSSI-MS setup



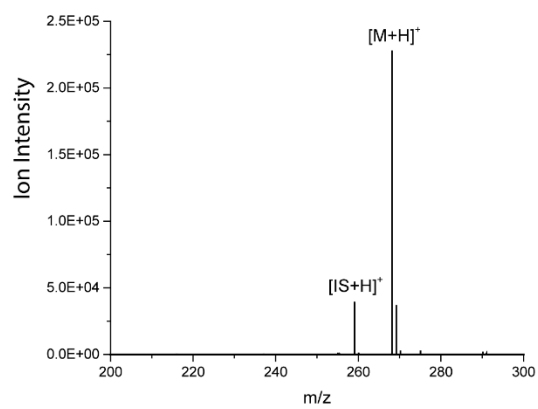

Capillary Temperature: 50 °C

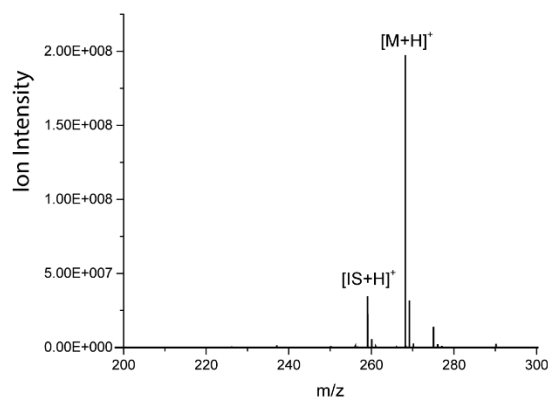

Capillary Temperature: 375 °C

Figure S4 Comparison of mass spectra of 10  $\mu$ M metoprolol with different capillary temperatures. Left: 50 °C; Right: 375 °C

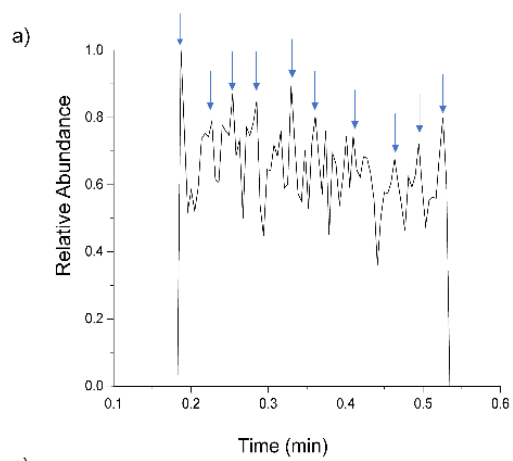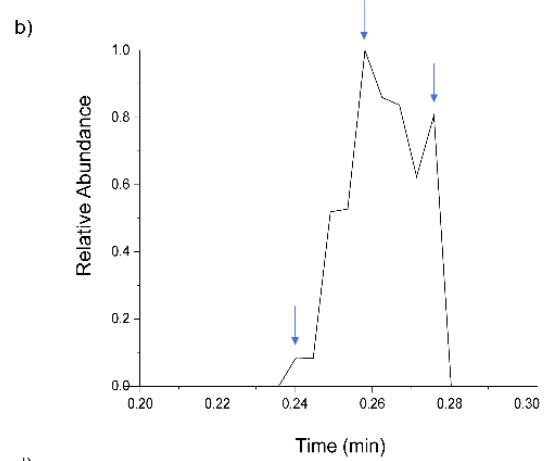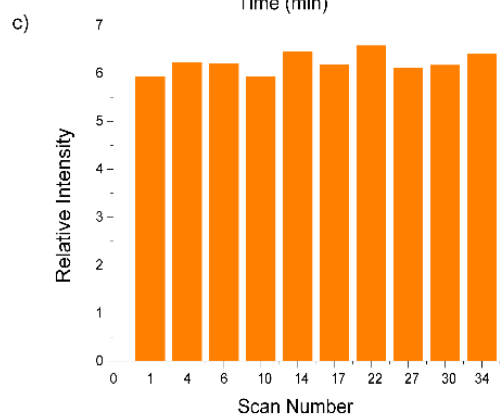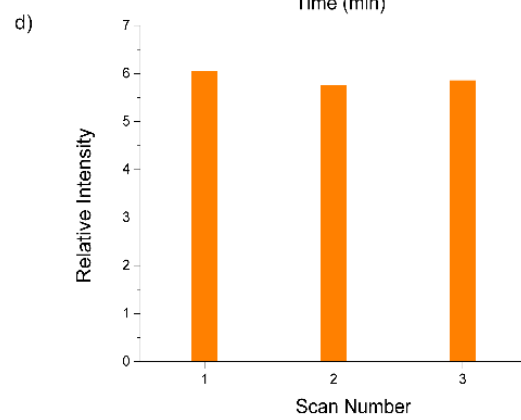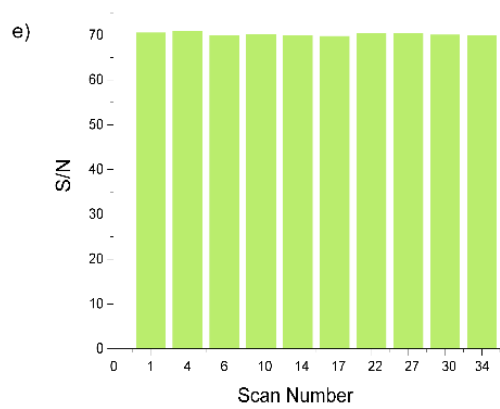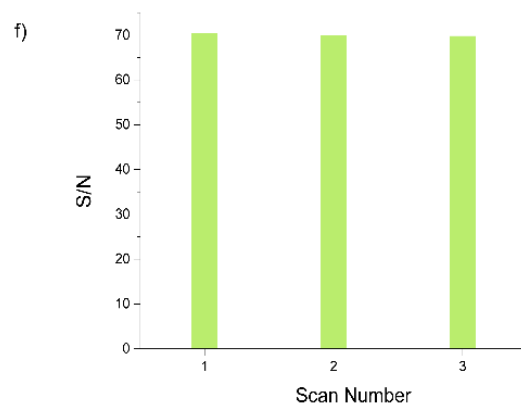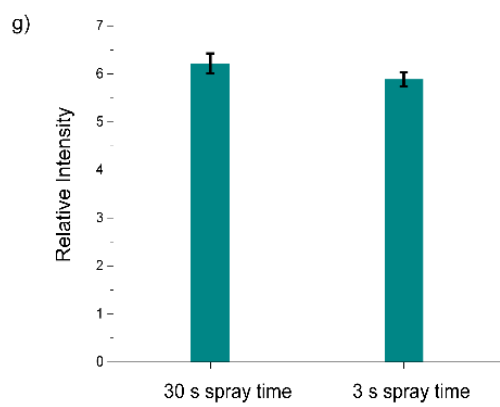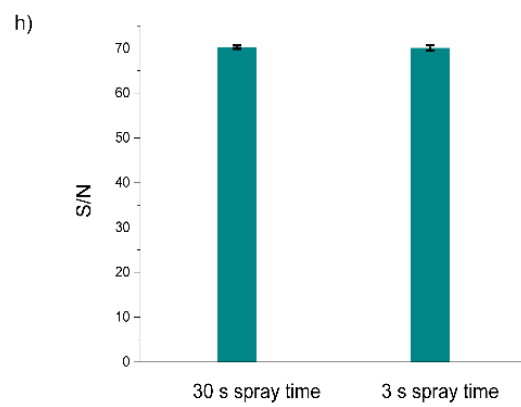

Figure S5 Comparison of MS signals with different spray time using 10  $\mu$ M metoprolol. a) and b) ion chromatograms of a 30 s spray and a 3 s spray, respectively. c) and d) Relative intensity of each scan of a 30 s spray and a 3 s spray, respectively. e) and f) S/N of each scan of a 30 s spray and a 3 s spray, respectively. g) and h) comparison of average relative intensity and S/N of a 30 s spray and a 3 s spray, respectively.

a)

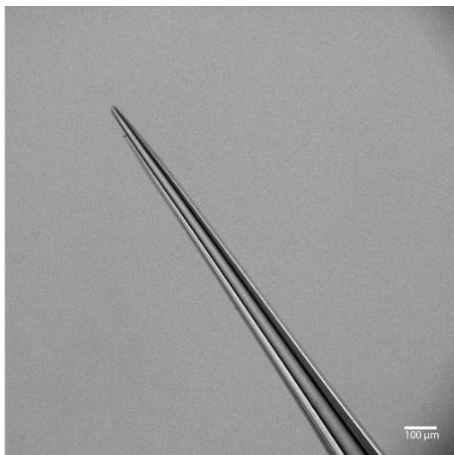

b)

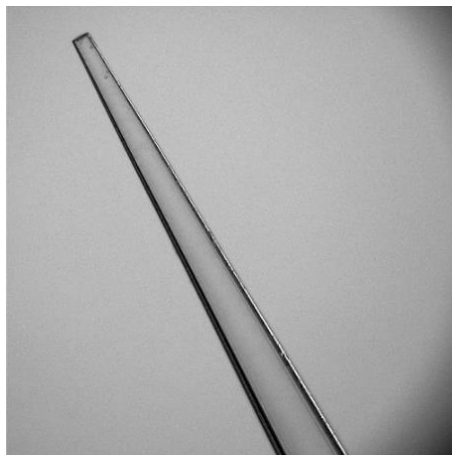

c)

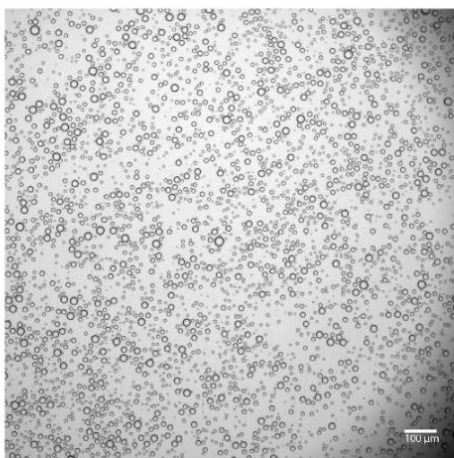

d)

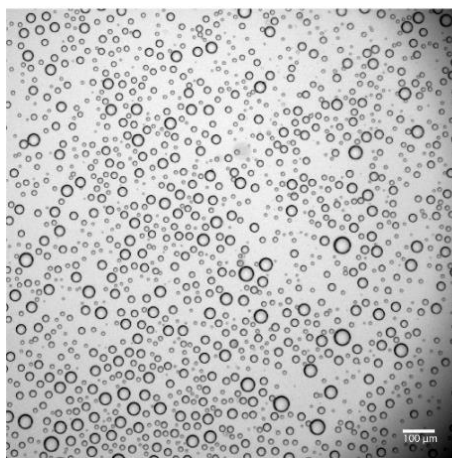

e)

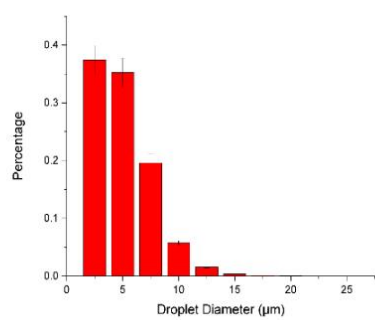

f)

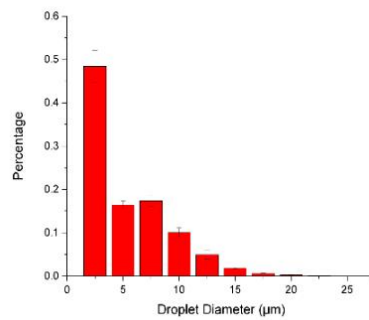

g)

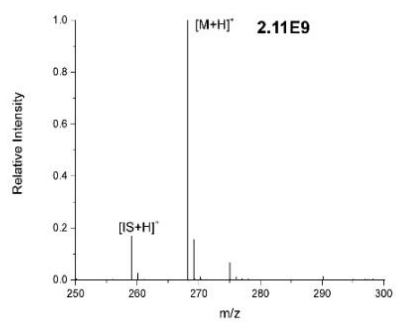

h)

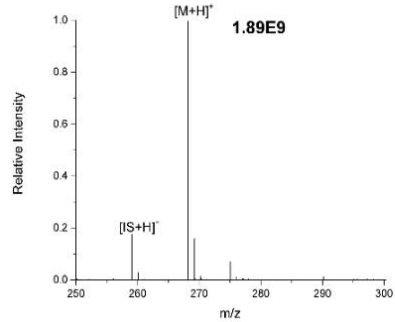

Figure S6 Comparison of capillaries with 15  $\mu\text{m}$  and 50  $\mu\text{m}$  tip size. a) and b) microscopy images of a 15  $\mu\text{m}$  tip and a 50  $\mu\text{m}$  tip, respectively. c) and d) microscopy images of droplets generated by a 15  $\mu\text{m}$  tip and a 50  $\mu\text{m}$  tip, respectively. e) and f) size distribution of droplets generated by a 15  $\mu\text{m}$  tip and a 50  $\mu\text{m}$  tip, respectively. g) and h) comparison of mass spectra of 10  $\mu\text{M}$  metoprolol generated by a 15  $\mu\text{m}$  tip and a 50  $\mu\text{m}$  tip, respectively.

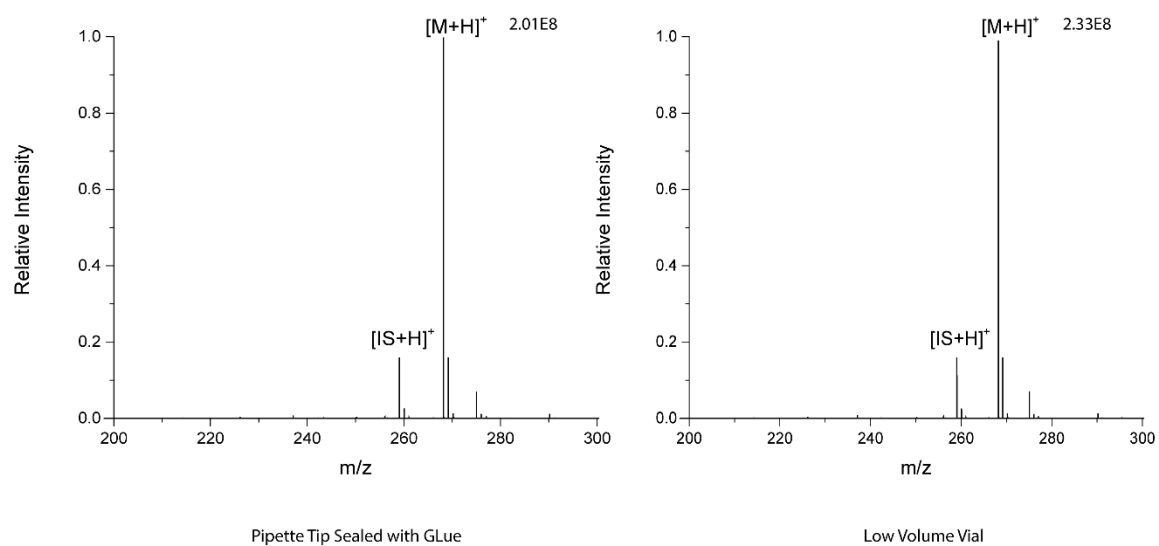

Figure S7 Comparison of mass spectra 10  $\mu$ M metoprolol obtained with glue seal (left) and without glue (right).

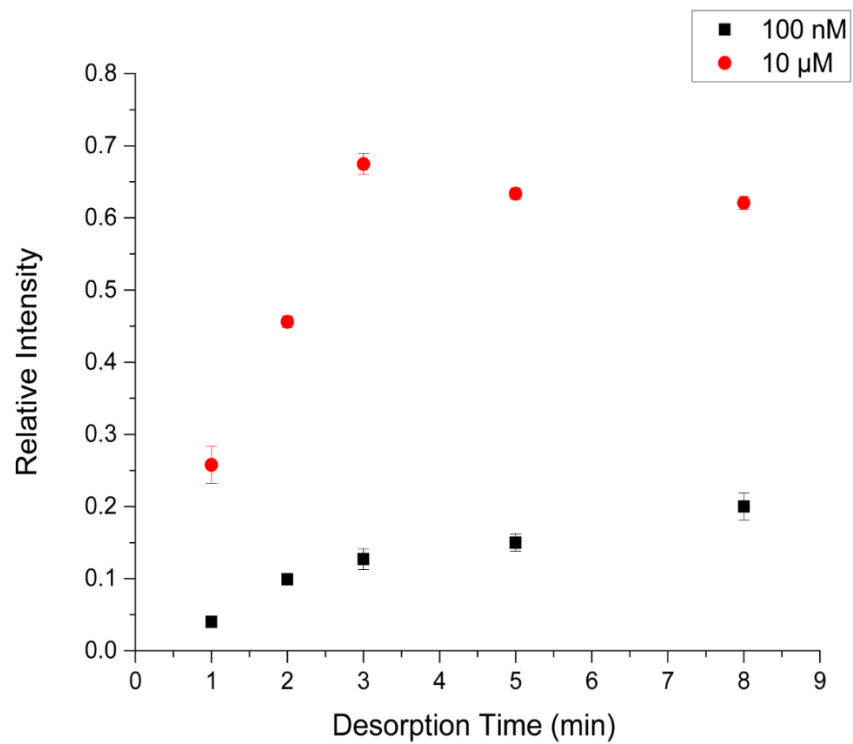

Figure S8 The relationship between the signal response and the desorption time with 500  $\mu\text{L}$  extraction volume, 24 min extraction time, and 6  $\mu\text{L}$  desorption volume for 100 nM and 10  $\mu\text{M}$  metoprolol samples.

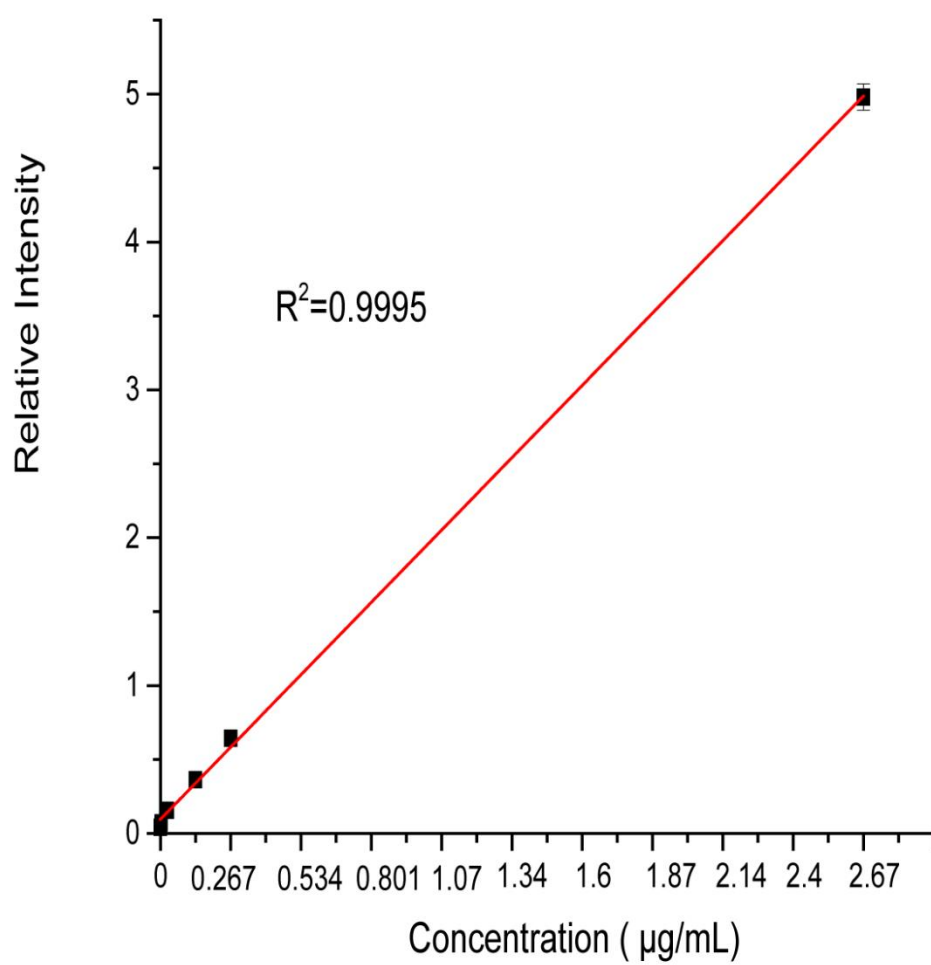

Figure S9: The calibration curve for metoprolol in serum samples obtained using SPME-cVSSI-MS.



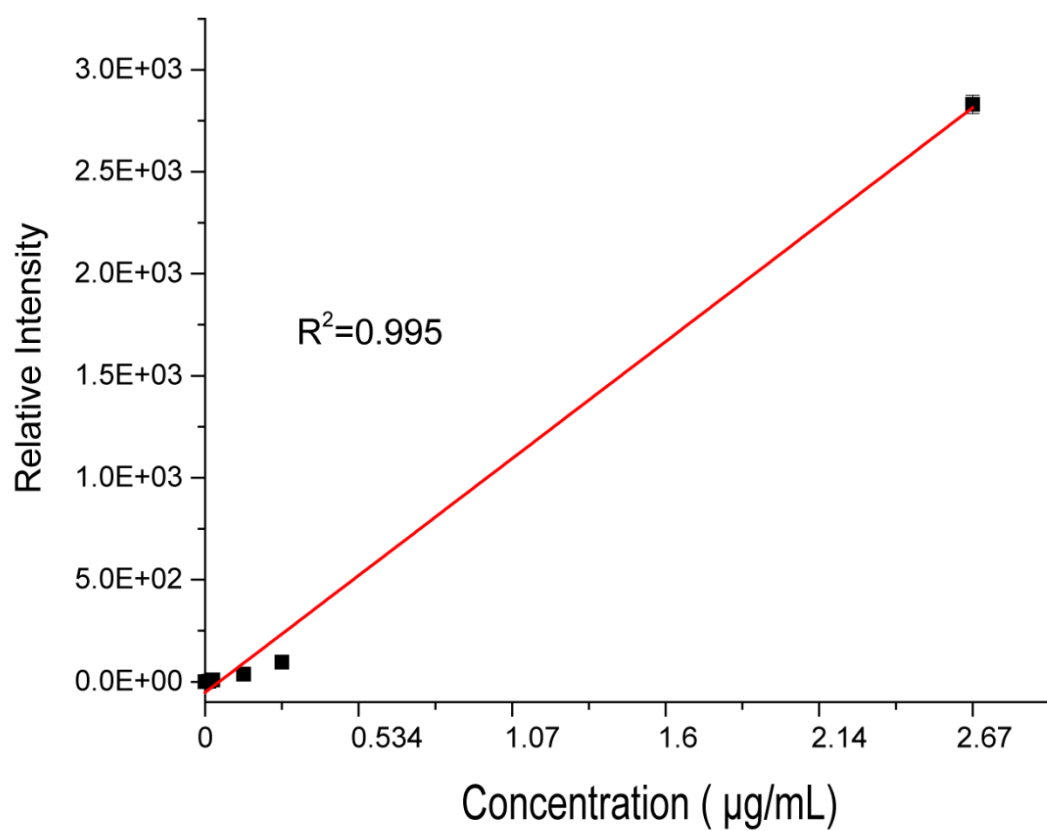

Figure S10: The calibration curve for metoprolol in serum samples obtained using SPME-nESI-MS.

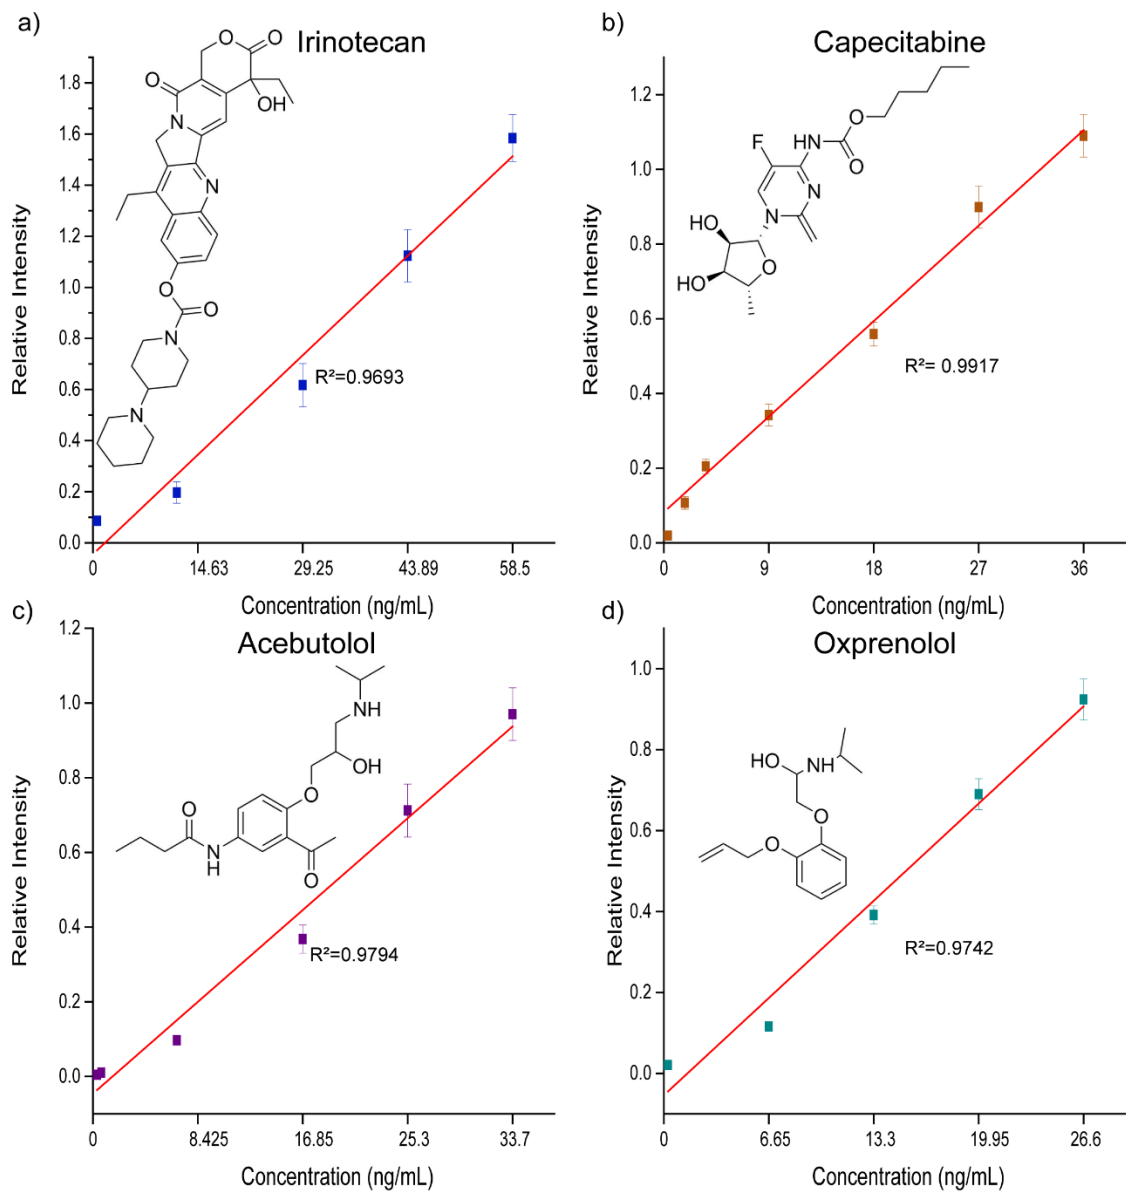

Figure S11: Calibration curves for 4 different drug compounds from serum samples. (a)-(d) irinotecan, capecitabine, acebutolol, and oxprenolol, respectively.

## References:

1. Lundborg, P., Steen, B.: Plasma levels and effect on heart rate and blood pressure of metoprolol after acute oral administration in 12 geriatric patients. *Acta medica Scandinavica*. 200, 397-402 (1976)
2. Abdel-Hamid, M.E., Phillips, O.A.: LC–MS/MS Determination of Carbamazepine, Pindolol, and Theophylline in Human Serum. *Journal of Liquid Chromatography & Related Technologies*. 26, 1937-1957 (2003)
3. Satoh, T., Yasui, H., Muro, K.E.I., Komatsu, Y., Sameshima, S., Yamaguchi, K., Sugihara, K.: Pharmacokinetic Assessment of Irinotecan, SN-38, and SN-38-Glucuronide: A Substudy of the FIRIS Study. *Anticancer Research*. 33, 3845 (2013)
4. Reigner, B., Blesch, K., Weidekamm, E.: Clinical Pharmacokinetics of Capecitabine. *Clinical pharmacokinetics*. 40, 85-104 (2001)
5. Love, J.N.: Acebutolol overdose resulting in fatalities. *The Journal of emergency medicine*. 18, 341-344 (2000)
6. Bolli, P., Bühler, F.R., Raeder, E.A., Amann, F.W., Meier, M., Rogg, H., Burckhardt, D.: Lack of beta-adrenoreceptor hypersensitivity after abrupt withdrawal of long-term therapy with oxprenolol. *Circulation*. 64, 1130-1134 (1981)
